# Supplementary material for: Progressive interdigital cell death: regulation by the antagonistic interaction between fibroblast growth factor 8 and retinoic acid
Source: Oxford University Press journal article supplement (doi:10.1242/dev.041954), 2009-10-09
Supplement: dev041954supptables1.pdf [file dev041954supptables1.pdf]

**Table S1. RAR-responsive elements in the *Bax* and *Bak* promoters**

| Gene       | Matrix                | Opt.<br>threshold | Start<br>position | End<br>position | Strand | Matrix<br>similitud | Core<br>similitud | Sequence                  |
|------------|-----------------------|-------------------|-------------------|-----------------|--------|---------------------|-------------------|---------------------------|
| <i>Bax</i> | Vertebrate RAR_RXR.01 | 0.78              | −1176             | −1152           | +      | 0.799               | 1.0               | atgttctggggttacAGGTatgggc |
| <i>Bax</i> | Vertebrate RAR_RXR.01 | 0.78              | −1074             | −1050           | −      | 0.798               | 1.0               | tacatagcaagtgaAGGTcaatta  |
| <i>Bax</i> | Vertebrate RAR_RXR.01 | 0.78              | −82               | −58             | +      | 0.781               | 0.769             | agtctgcggggcggAGGCcatgtt  |
| <i>Bak</i> | Vertebrate RAR_RXR.01 | 0.78              | −107              | −83             | +      | 0.805               | 1.0               | taagtactgggattaAGGTcacaca |

One-thousand-five-hundred base pairs upstream, the transcription initiation site of *Bax* and *Bak* were analyzed using the MatInspector software from Genomatix. The matrix analyzed belongs to the 'matrix family' Vertebrate RXRF. 'Optimized threshold' is the optimized value defined in a way that a minimum number of matches is found in non-regulatory test sequences (i.e. with this matrix similarity the number of false-positive matches is minimized). 'Start' and 'End' position indicates the position in the DNA sequence where the core sequence is found in reference to the transcription initiation site. 'Matrix similitud' defines a value for the most conserved nucleotides at that position in the matrix; a perfect match to the matrix gets a score of 1.00. The 'Core sequence' of a matrix is defined as the highest conserved positions (usually 4) of the matrix. Base pairs in capital letters denote the core sequence used by MatInspector and red letters are important nucleotides.
